# Supplementary material
Source: publisher figshare collection journal article supplement (https://acs.figshare.com/ndownloader/files/4505608)
Supplement: Supplementary file 1 [file 4505608]

# **Got TiO<sub>2</sub> Nanotubes? Lithium Ion Intercalation can Boost Their Photoelectrochemical Performance**

## **Supporting Information**

Benjamin H. Meekins and Prashant V. Kamat\*

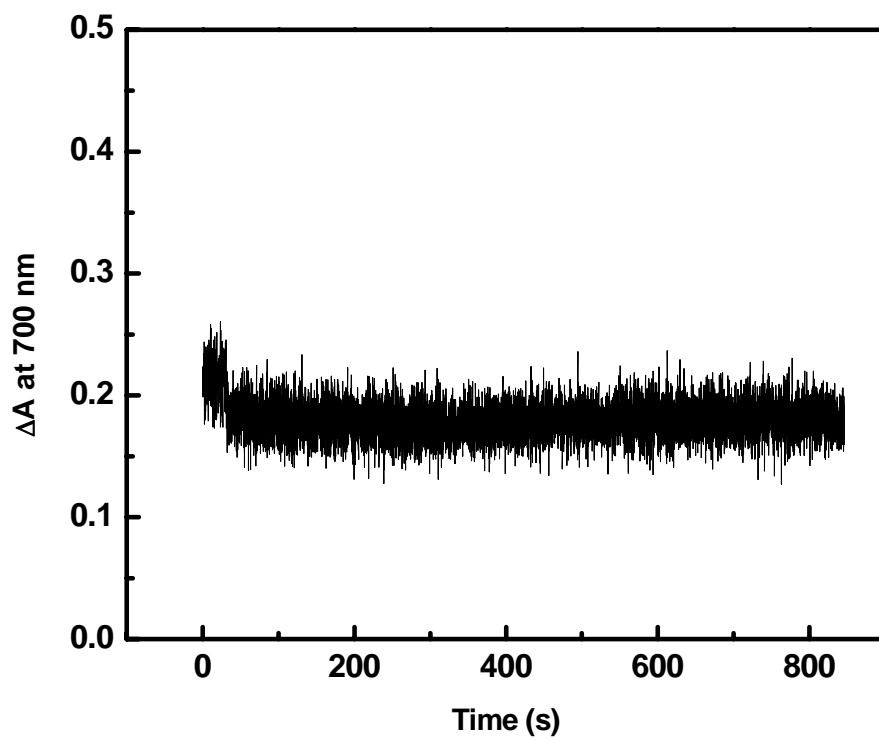

Figure S1: Absorbance at 700 nm as 1V (vs. Ag/AgCl) is applied for 5 minutes. Electrolyte is 1M KOH. Application of voltage occurred after 30s of steady state measurement and ended at 330s.

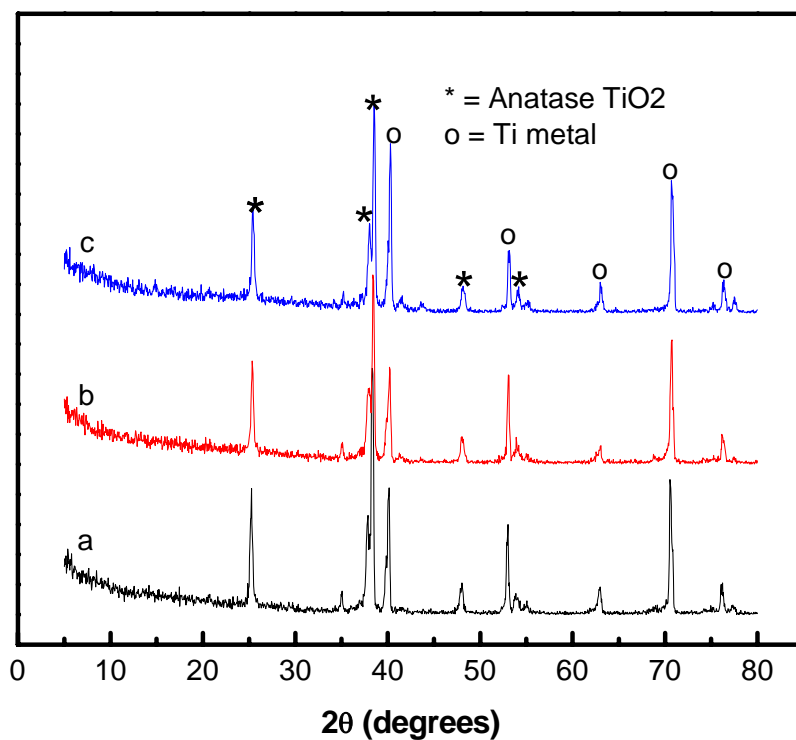

Figure S2: XRD patterns of (a)  $\text{TiO}_2$  nanotubes on Ti substrate, (b)  $\text{TiO}_2$  nanotubes on Ti substrate after applying potential of -1.5V in 1M  $\text{LiClO}_4$  for 3 seconds, and (c)  $\text{TiO}_2$  nanotubes on Ti substrate after applying potential of -1.5V in 1M  $\text{LiClO}_4$  for 5 minutes
